# Supplementary material for: Rejuvenation of peripheral immune cells attenuates Alzheimer’s disease-like pathologies and behavioral deficits in a mouse model
Source: PubMed Central journal article supplement — Sci Adv. 2024 May 29;10(22):eadl1123. doi: 10.1126/sciadv.adl1123 (PMC11135428; doi:10.1126/sciadv.adl1123), 2024-05-29
Supplement: sciadv.adl1123_sm.pdf [file sciadv.adl1123_sm.pdf]

Supplementary Materials for  
**Rejuvenation of peripheral immune cells attenuates Alzheimer's disease-like pathologies and behavioral deficits in a mouse model**

Pu-Yang Sun *et al.*

Corresponding author: Yan-Jiang Wang, [yanjiang\\_wang@tmmu.edu.cn](mailto:yanjiang_wang@tmmu.edu.cn); Jun Wang, [qywangjun@163.com](mailto:qywangjun@163.com)

*Sci. Adv.* **10**, eadl1123 (2024)  
DOI: 10.1126/sciadv.adl1123

**The PDF file includes:**

Figs. S1 to S13  
Tables S3 and S4  
Legends for tables S1, S2, and S5

**Other Supplementary Material for this manuscript includes the following:**

Tables S1, S2, and S5

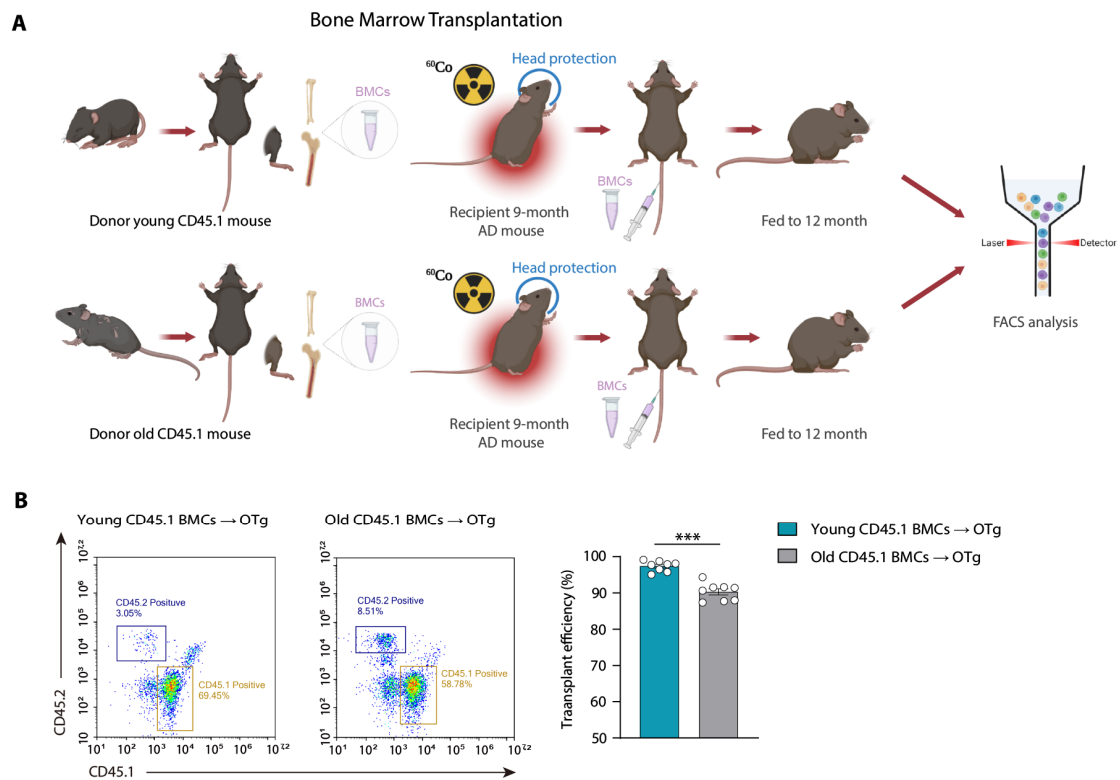

**Fig. S1. Analysis of the bone marrow transplantation efficiency by flow cytometry.**

(A) Schematic presentation of the experimental design used to investigate transplantation efficiency. CD45.1<sup>+</sup> WT mice were used as donors instead of CD45.2<sup>+</sup> *APP/PS1* mice to distinguish between donor and recipient origins of PBMCs. (B) Flow cytometry (left) and quantification (right) showing the transplant efficiency. Transplant efficiency was calculated as  $CD45.1^+ / (CD45.1^+ + CD45.2^+)$ . Un-paired t-test. \*\*\*indicates  $p < 0.001$ , and the error bars are the SEMs.

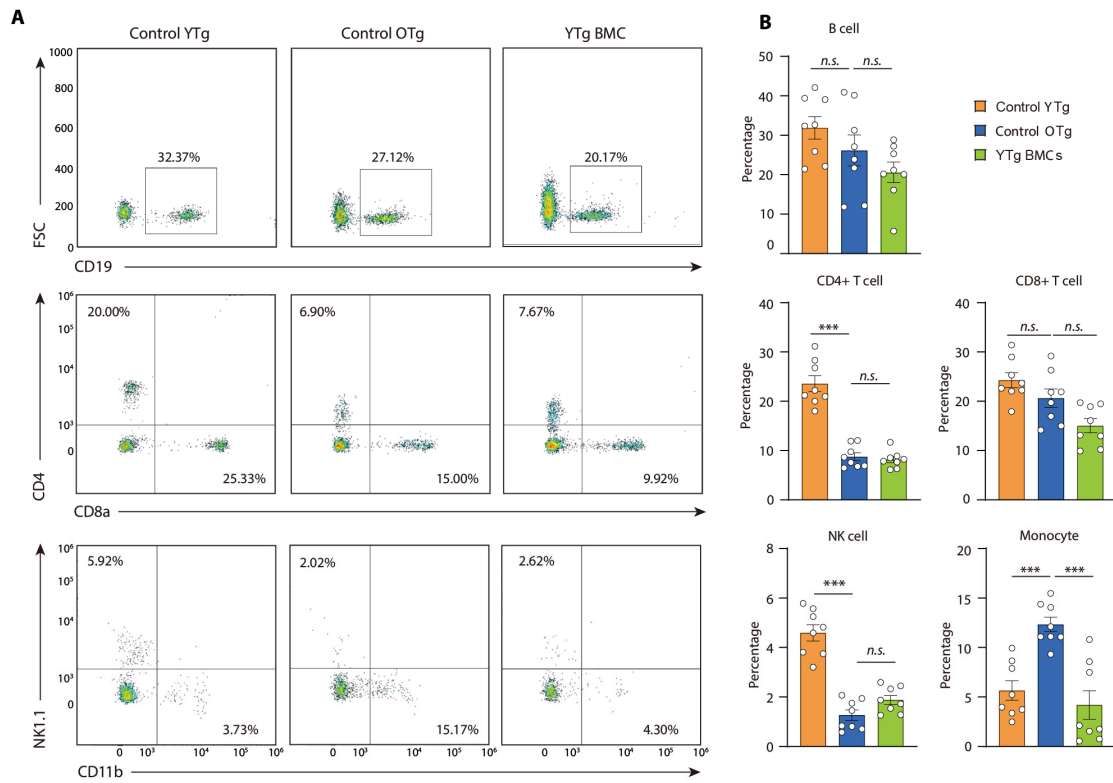

**Fig. S2. Quantification of the cell proportion of the main immune cell types in PBMCs by flow cytometry. (A)** Representative FACS plot of marker gene staining of different immune cell types. **(B)** Quantification showing the percentages of B cells, CD4<sup>+</sup> cells, CD8<sup>+</sup> cells, NK cells and monocytes in peripheral blood from control YTg, control OTg and YTg BMC mice. One-way ANOVA. \*\*\*indicates  $p < 0.001$ , and the error bars are the SEMs.

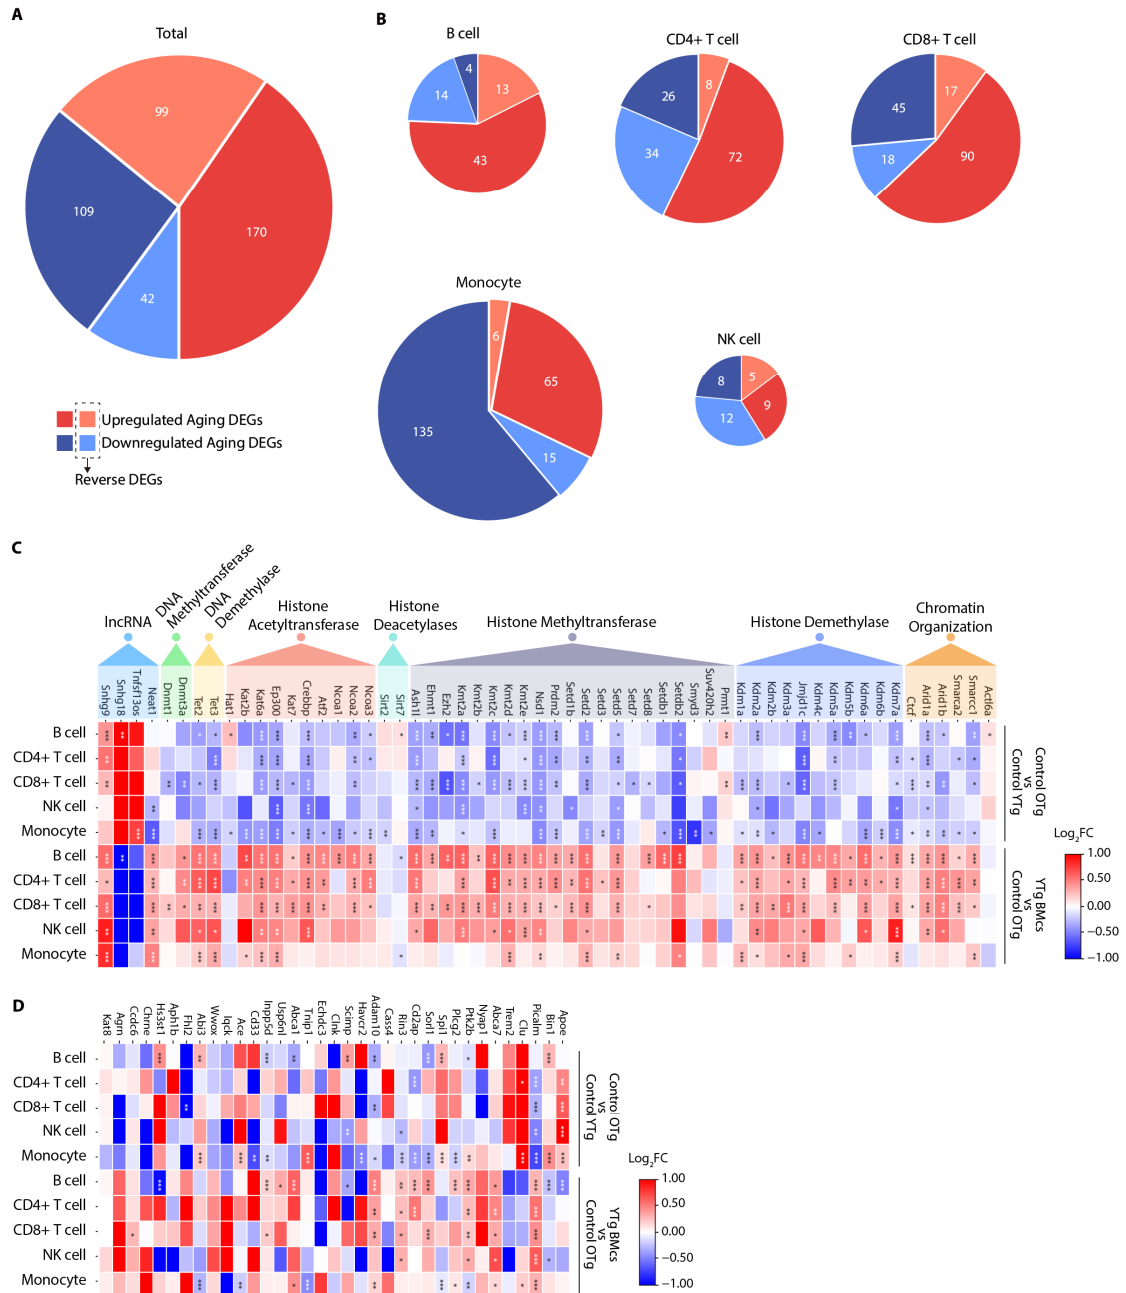

**Fig. S3. Young BMT reverse gene expression in senescent immune cells. (A)**

Summary of the total aging and reverse DEGs in PBMCs. The red and pink parts represent the total upregulated aging DEGs, while the pink part represents those whose expression was reversed after young BMT. **(B)** Summary of the aging and reverse DEGs in each subcell-type. **(C)** Heatmap of the epigenetics regulation associated genes in

each cell type. The color key indicates the Log<sub>2</sub>FC value. **(D)** Heatmap of the top 45 AD risk genes in aging and BMT of B cells, CD4<sup>+</sup> T cells, CD8<sup>+</sup> T cells, NK cells and monocytes. The color indicates the Log<sub>2</sub>FC values. \*indicates  $p < 0.05$ , \*\*indicates  $p < 0.01$ , \*\*\*indicates  $p < 0.001$ .

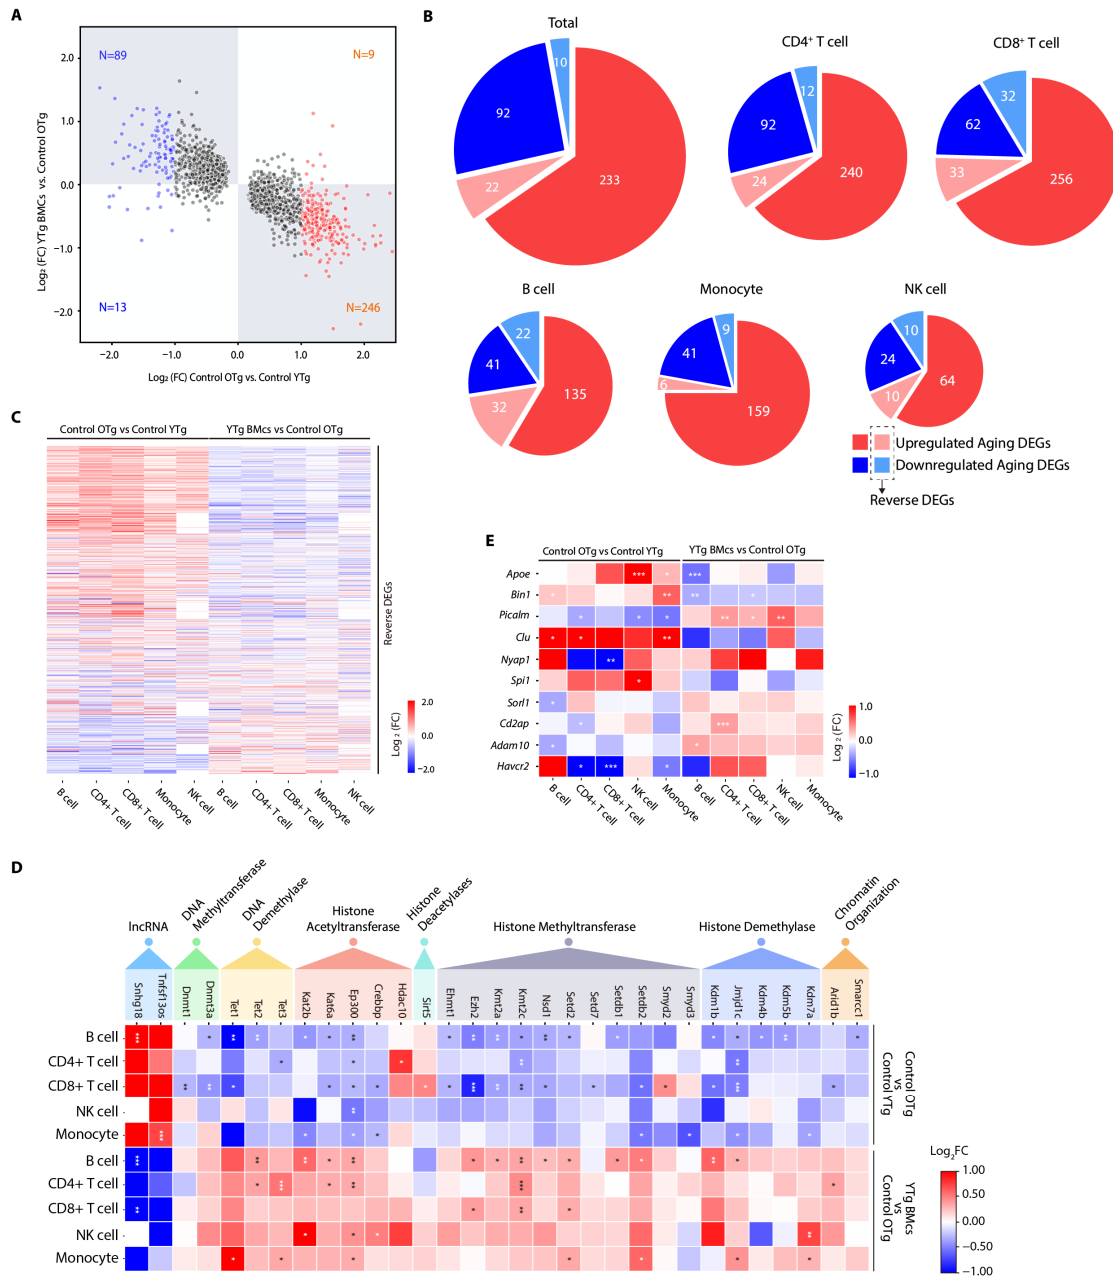

**Fig. S4. Aging and reverse-DEGs in multiple cell types of PBMCs analyzed by pseudobulk DEG analysis.** (A) Scatter plot of the general aging DEGs (cut-off by  $p < 0.05$ ,  $\text{Log}_2\text{FC} > 1.0$ ) in PBMCs. (B) Summary of the total and each sub cell-type aging and reverse DEGs in PBMCs. The red and pink parts represent the total upregulated aging DEGs, while the pink part represents those whose expression was reversed after young BMT. (C) Heatmap of the reversed DEGs in each cell type alongside the young

BMT. The color key indicates the Log<sub>2</sub>FC values. (D) Heatmap of the epigenetics-related genes in aging and BMT of B cells, CD4<sup>+</sup> T cells, CD8<sup>+</sup> T cells, NK cells and monocytes. (E) The expression of differentially expressed AD risk genes in aging and BMT of B cells, CD4<sup>+</sup> T cells, CD8<sup>+</sup> T cells, NK cells and monocytes. The color indicates the log<sub>2</sub>FC values. \*indicates  $p < 0.05$ ; \*\*indicates  $p < 0.01$ , \*\*\*indicates  $p < 0.001$ . The error bars are the SEMs. FC: fold change.

**A**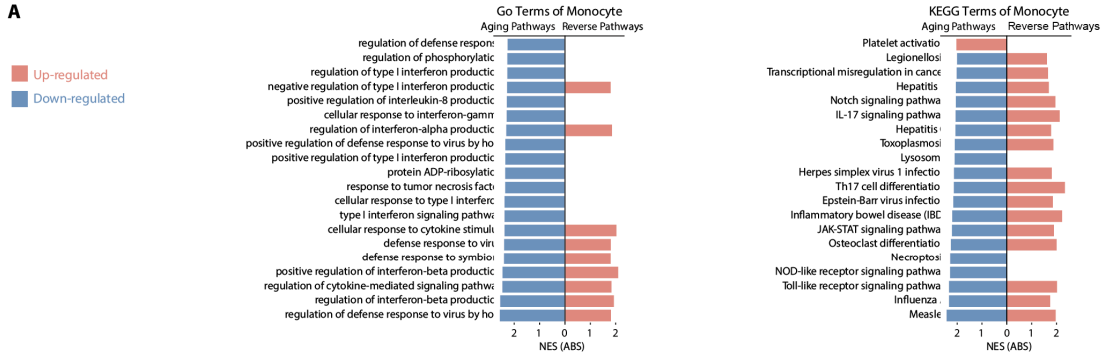**B**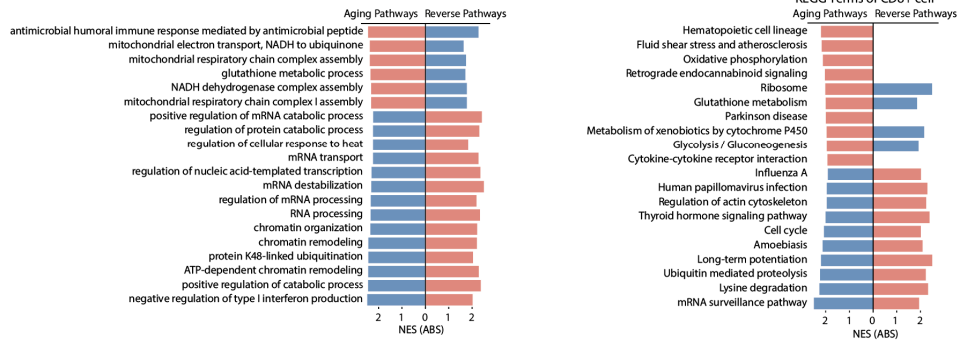**C**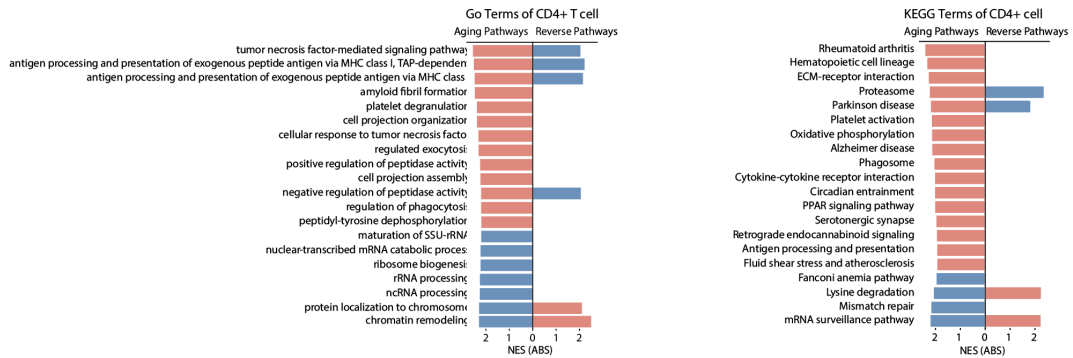**D**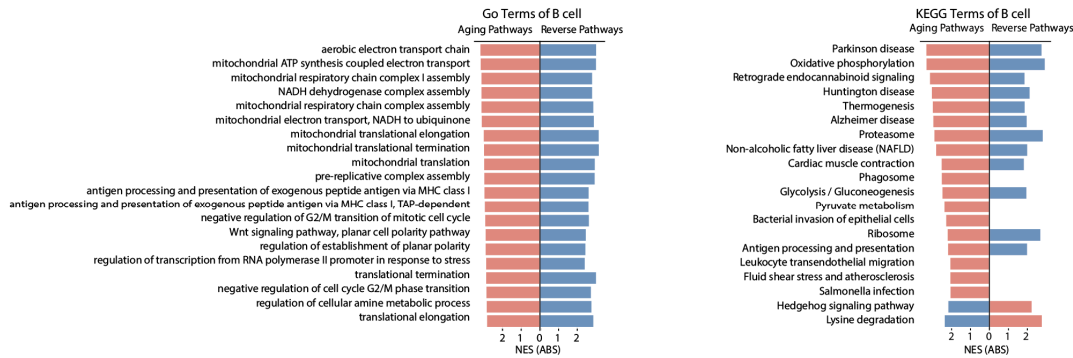**E**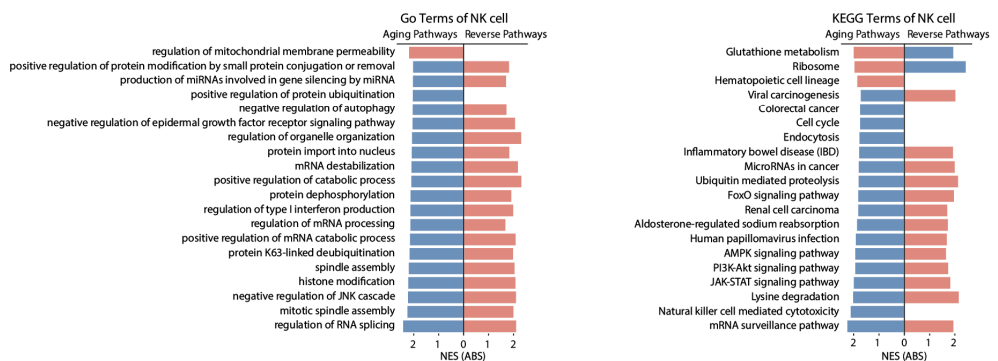



**Fig. S5. Young BMT mitigate aging pathways in senescent immune cells.** Go and KEGG functional annotation of the aging and reverse DEGs. In each panel, the left half represents aging DEG-enriched pathways (aging pathway), while the right half represents reverse DEG-enriched pathways (reverse pathway). NES(ABS): absolute normalized enrichment score.

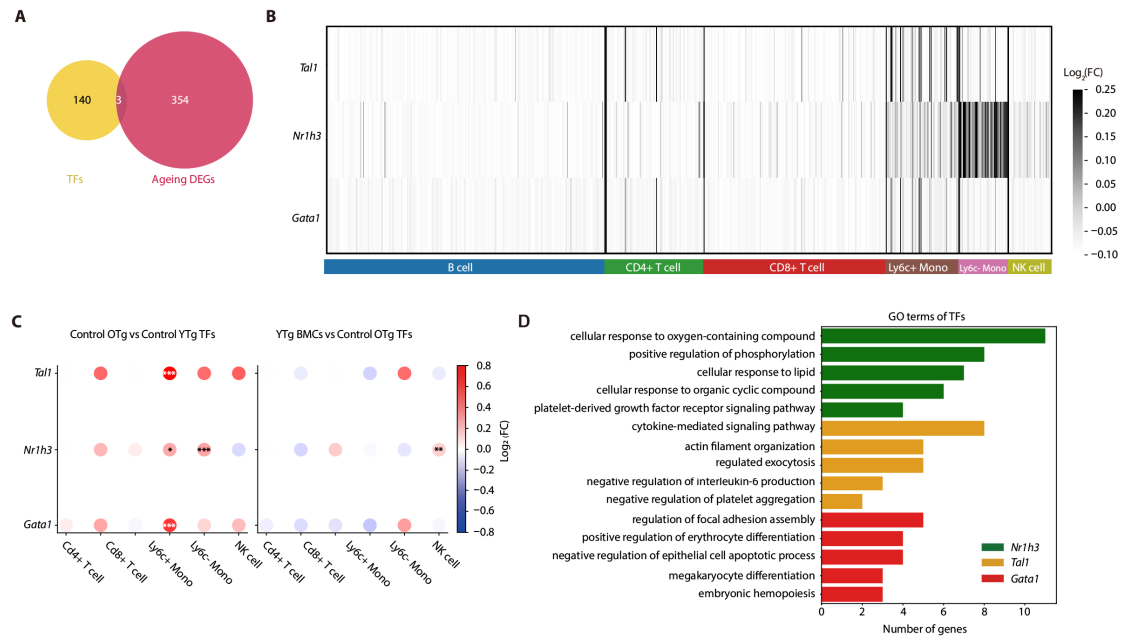

**Fig. S6. Transcription factors of the aging and reverse-DEGs analyzed by pseudobulk DEG analysis.** (A) Venn plot of the identified transcription factors (TFs) and aging DEGs in PBMCs. (B) Heatmap of the expression level of TFs in each cell type. The color key indicates the Log<sub>2</sub>FC values. (C) Dot plots of the effects of aging and young BMT on TF expression. The color key indicates the Log<sub>2</sub>FC values. (D) Bar plots of the GO terms enriched by the target genes of Tal1, Nr1h3 and Gata1. The downstream genes of Tal1, Nr1h3 and Gata1 were obtained from the Regulon analysis using SCENIC, and the genes identified through SCENIC analysis may not be DEGs. \*indicates  $p < 0.05$ , \*\*indicates  $p < 0.01$ , \*\*\*indicates  $p < 0.001$ .

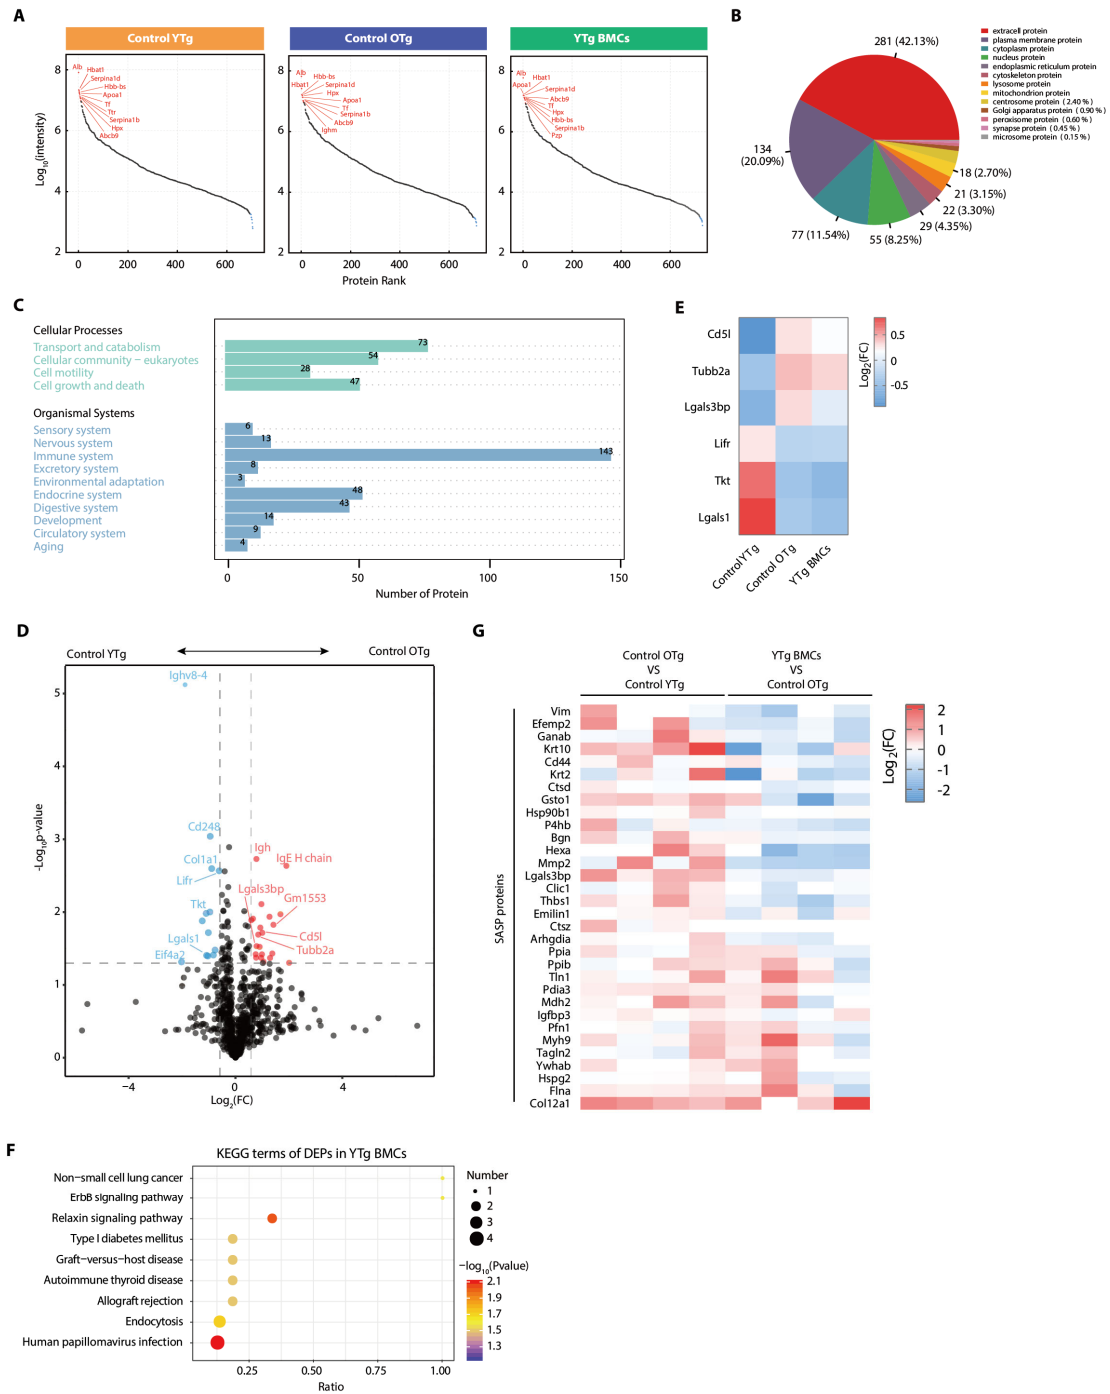

**Fig. S7. Young BMT downregulate plasma SASP proteins in aged *APP/PS1* mice.**

(A) Ranked abundances of plasma proteins in the control YTg, control OTg, and YTg BMC groups. (B) Subcellular distribution analysis of the plasma proteome. (C) KEGG annotation of the cell process and organismal system of the plasma proteins. (D)

Volcano map of the protein abundances between control YTg and control OTg. **(E)** Heatmap of the aging-related plasma proteins across the control YTg, control OTg, and YTg BMC groups. The color key indicates the Log<sub>2</sub>FC values. **(F)** KEGG functional annotation of differentially expressed proteins (DEPs) in YTg BMC plasma compared to control OTg plasma. Pathways with p-value<0.05 were displayed. **(G)** Heatmap of the SASP proteins across the control YTg, control OTg, and YTg BMC groups. The color key indicates the Log<sub>2</sub>FC values.

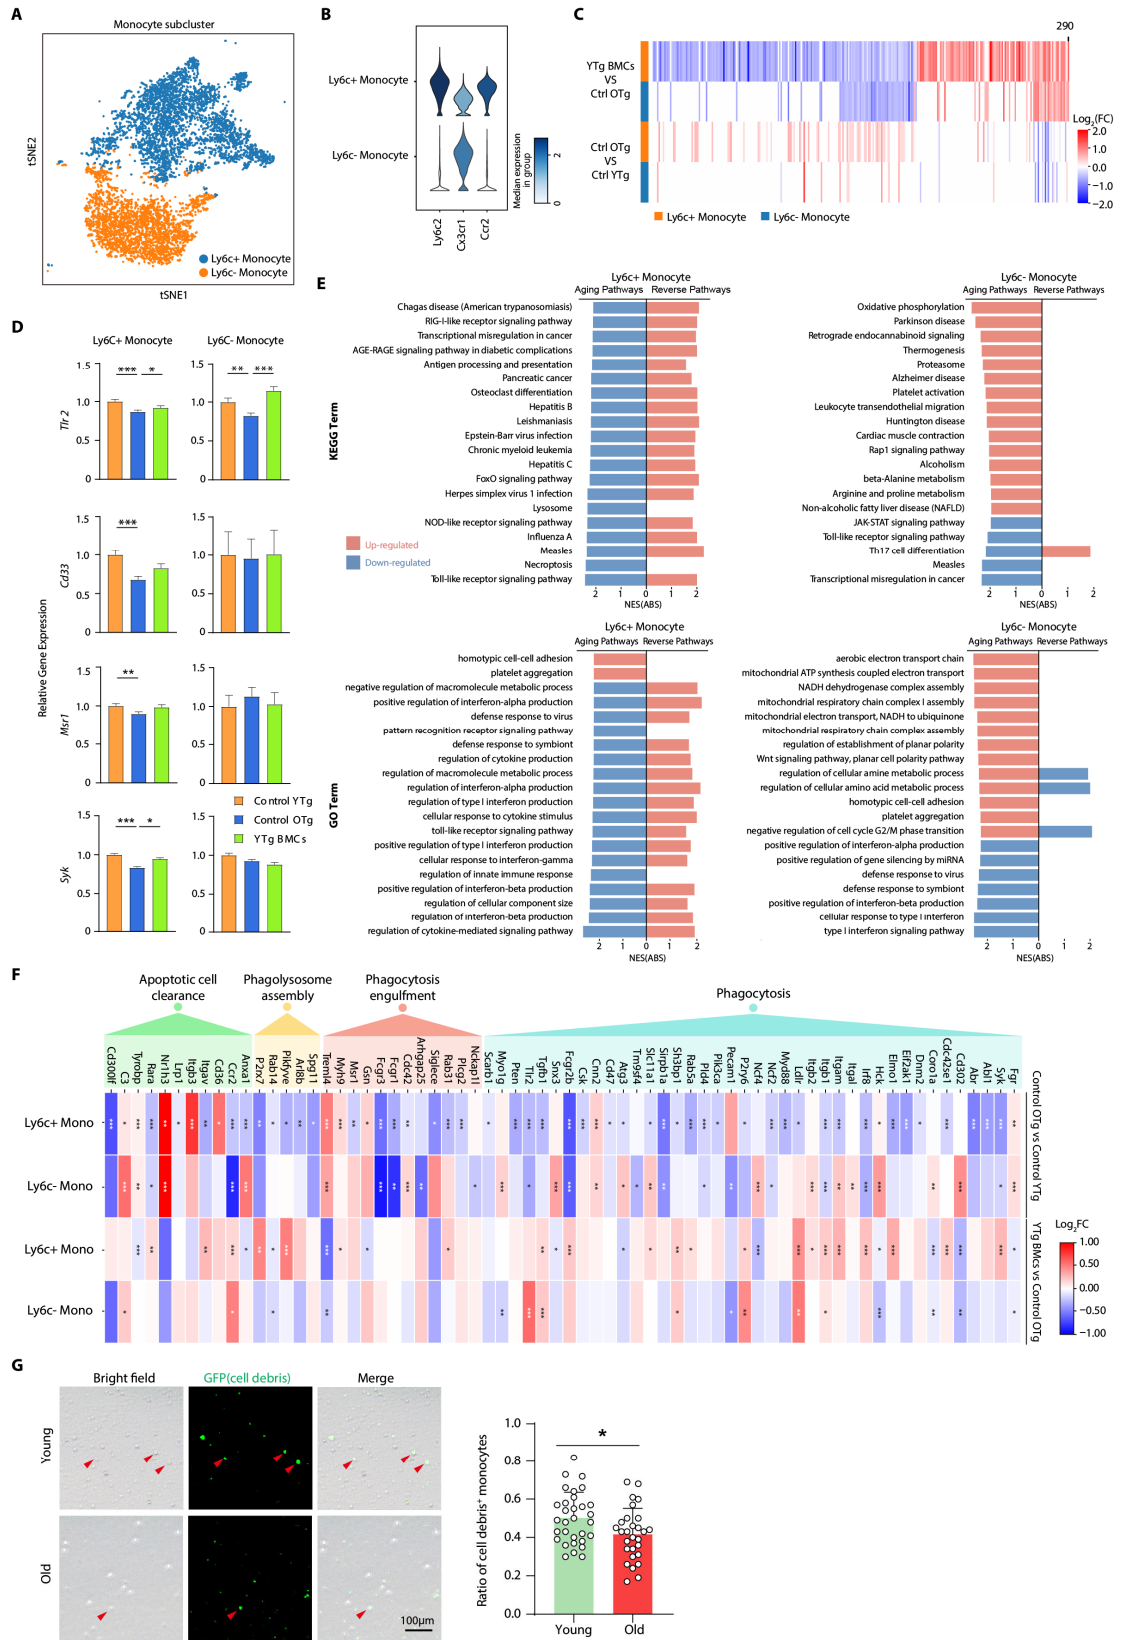

**Fig. S8. Analysis of the effects of senescence on different monocyte subtypes. (A)**

tSNE projection of monocyte subclusters. **(B)** Violin plot of marker gene expression in monocyte subclusters. **(C)** Heatmap of the aging and reversed DEGs in monocyte subclusters. The color key indicates the log<sub>2</sub>FC values. **(D)** Levels of expression of the A $\beta$  uptake-related receptors *Tlr2*, *Cd33*, *Msr1* and *Syk* in monocyte subclusters. One-way ANOVA. **(E)** The GO and KEGG terms enriched by the aging and reverse DEGs in monocyte subclusters. **(F)** Heatmap of phagocytosis related genes in monocyte subclusters. The color key indicates the Log<sub>2</sub>FC values. **(G)** Quantification of the levels of cell debris phagocytosis in young and old monocytes. n=30. Un-paired t-test. \*indicates p < 0.05; \*\*indicates p < 0.01, \*\*\*indicates p < 0.001. The scale bar in g is 100  $\mu$ m. The error bars are the SEMs.

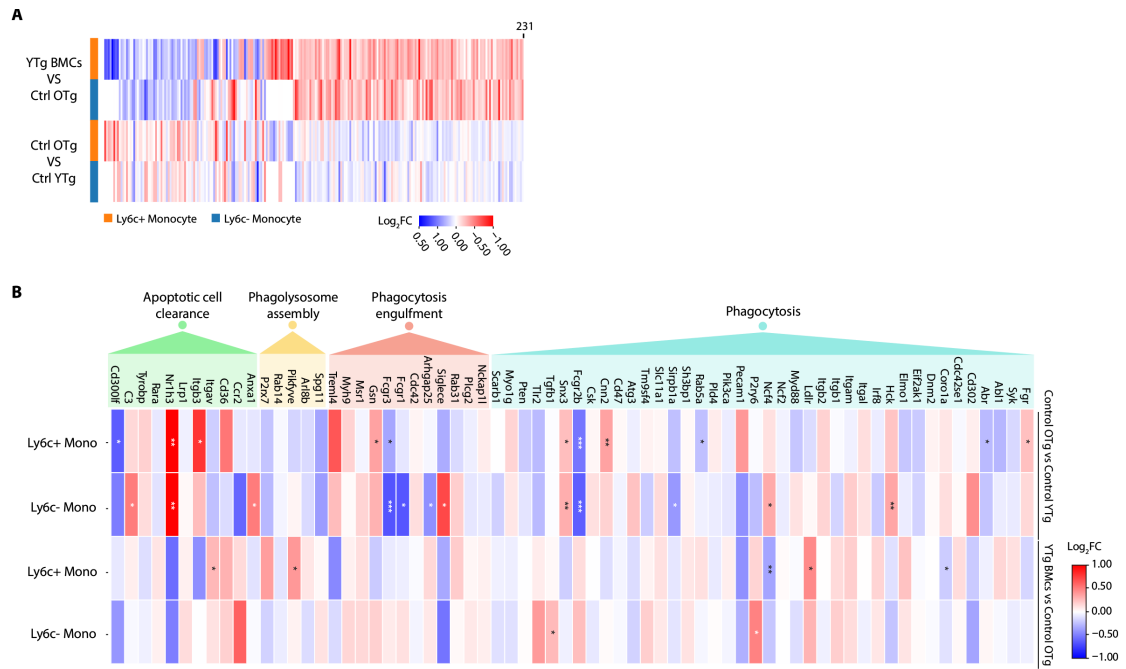

**Fig. S9. Aging and reverse-DEGs in different monocyte subclusters analyzed by pseudobulk DEG analysis.** (A) Heatmap of the aging and reversed DEGs in monocyte subclusters. The color key indicates the Log<sub>2</sub>FC values. (B) Heatmap of phagocytosis related genes in monocyte subclusters. The color key indicates the Log<sub>2</sub>FC values. The color indicates the Log<sub>2</sub>FC values. \*indicates  $p < 0.05$ , \*\*indicates  $p < 0.01$ , \*\*\*indicates  $p < 0.001$ .

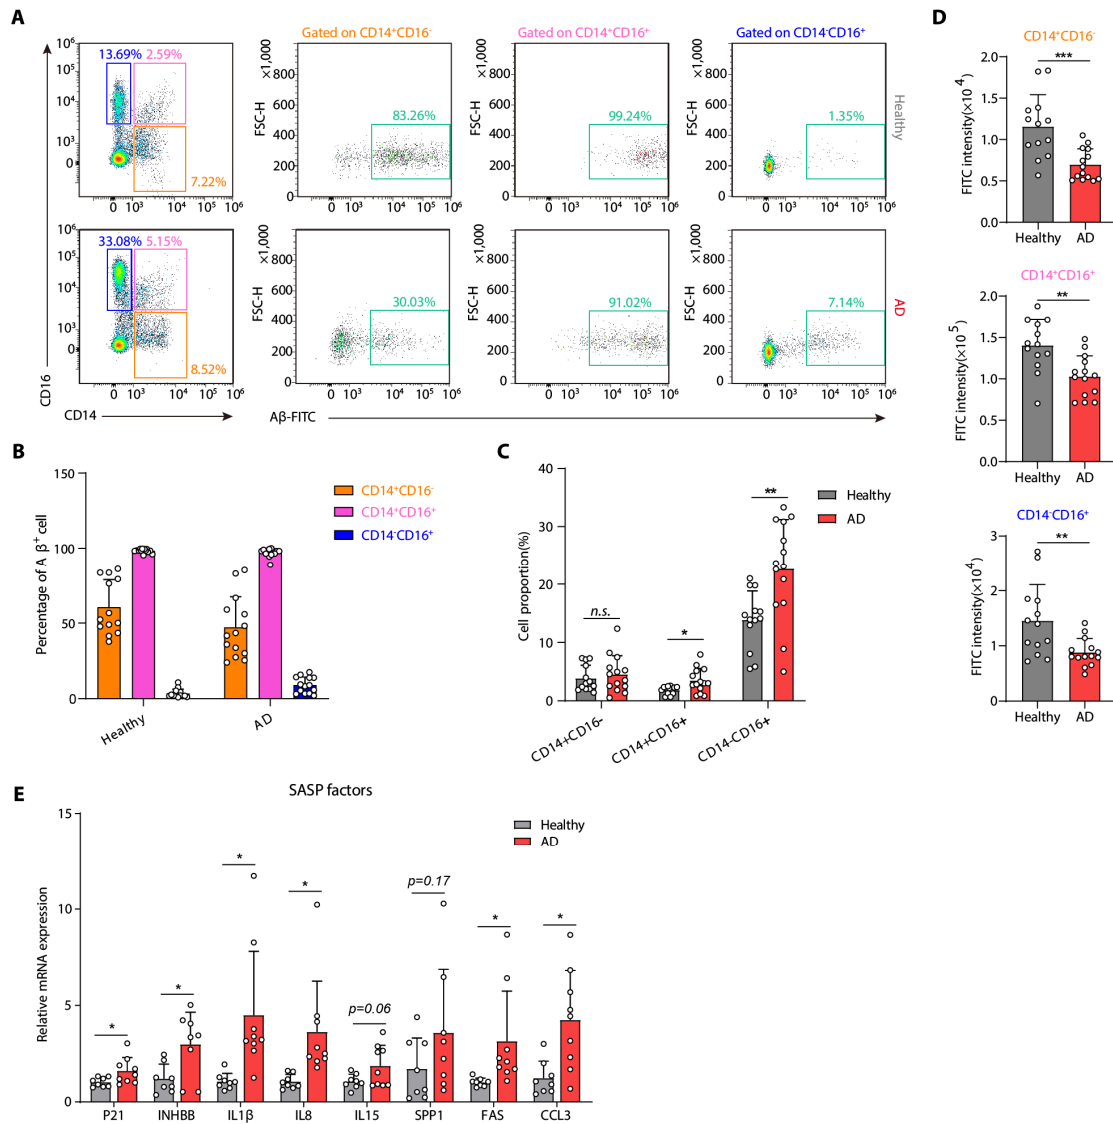

**Fig. S10. Comparison of peripheral blood monocytes from AD patients and healthy controls on senescent phenotypes. (A)** Representative FACS plot of marker gene staining of different monocytes subtypes in AD patients and healthy controls, including classical (CD14<sup>+</sup>CD16<sup>-</sup>), intermediate (CD14<sup>+</sup>CD16<sup>+</sup>), and non-classical (CD14<sup>-</sup>CD16<sup>+</sup>) monocytes. **(B)** Proportion of Aβ<sup>+</sup> cells in different monocytes subtypes. **(C)** Proportion of different monocytes subtypes in PBMC from AD patients and healthy controls. Un-paired t-test. **(D)** Quantification of the levels of monocyte Aβ<sub>42</sub> uptake in



different monocytes subtypes from AD patients and healthy controls. Un-paired t-test.

(E) Quantification of senescence marker and SASP factors mRNA level in CD14<sup>+</sup>

monocytes from AD patients and healthy controls. Un-paired t-test. \*indicates  $p < 0.05$ ,

\*\* indicates  $p < 0.01$ , \*\*\*indicates  $p < 0.001$ . The error bars are the SEMs.

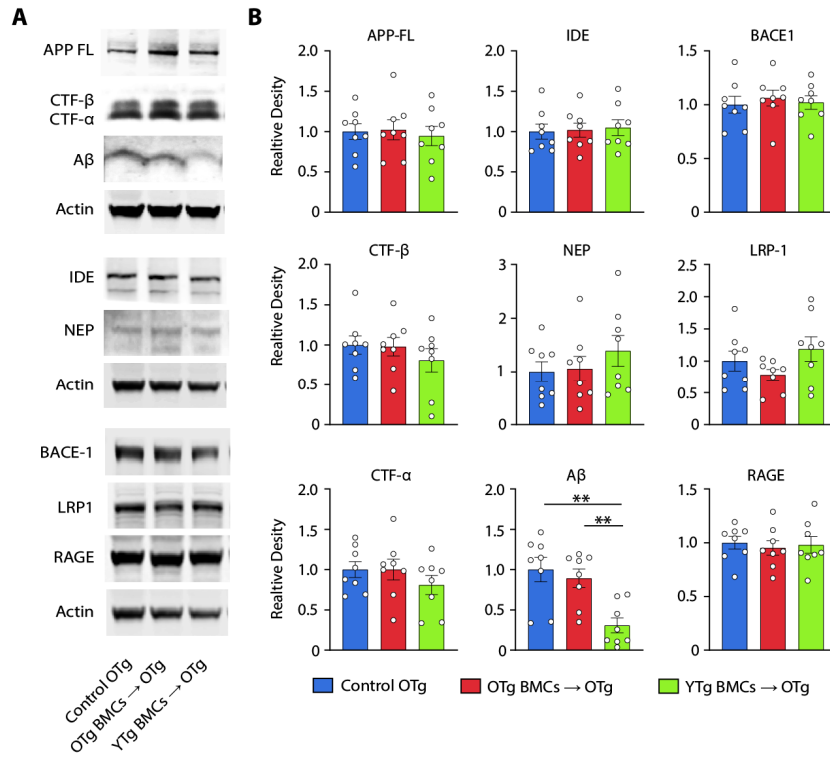

**Fig. S11. Quantification of cerebral A $\beta$  metabolism pathway-related proteins. (A)**

Representative western blot image of A $\beta$  metabolism pathway-related proteins in brain homogenates. **(B)** Quantification analysis of A $\beta$  metabolism pathway-related proteins.

n=8 per group. One-way ANOVA. \*\*indicates  $p < 0.01$ , and the error bars are the SEMs.

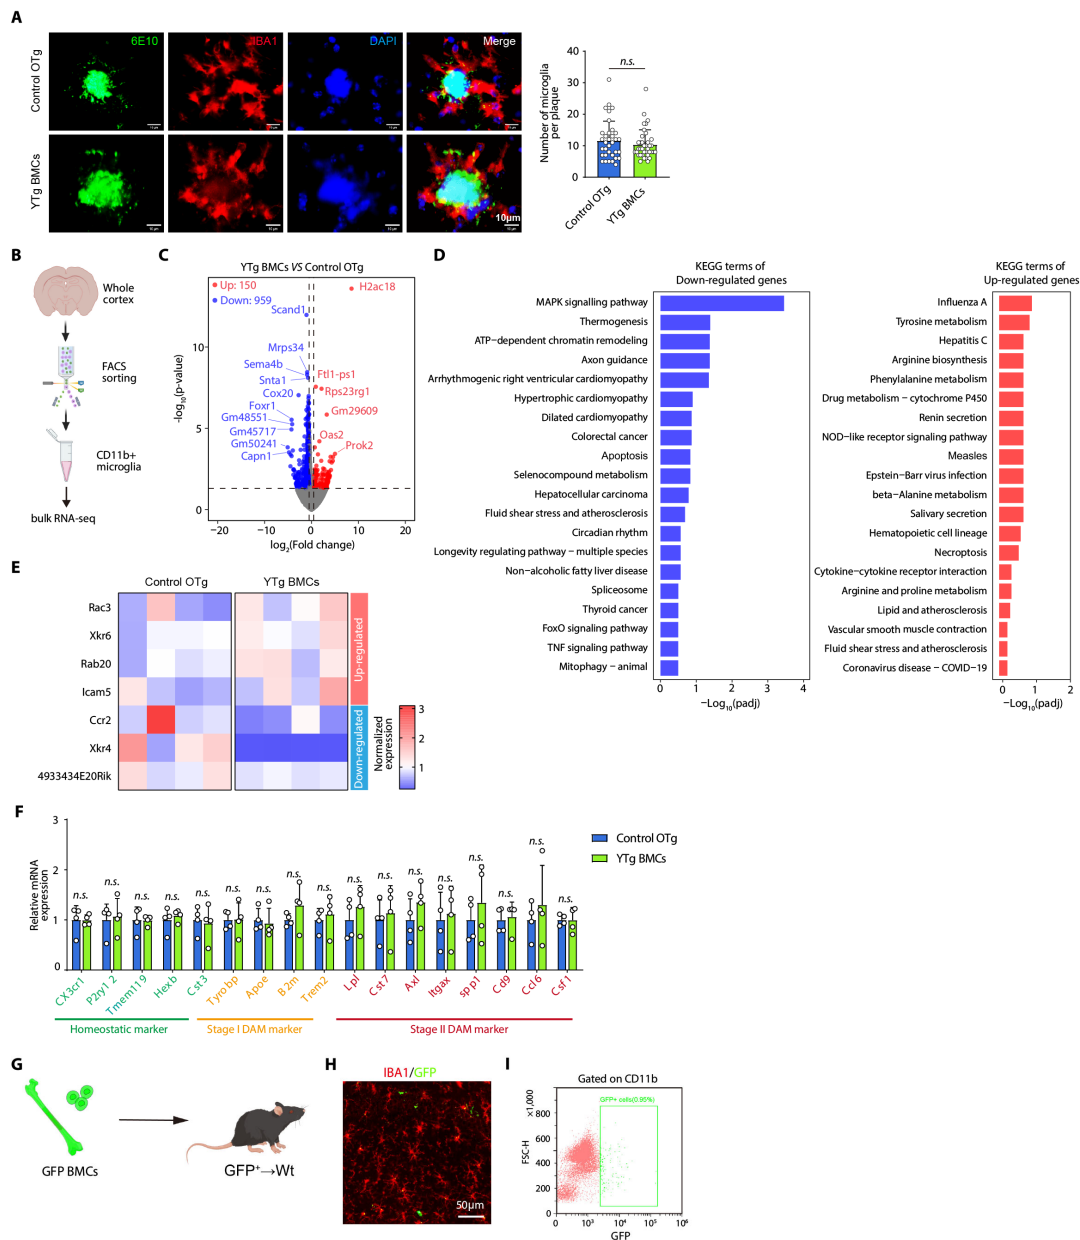

**Fig. S12. Effects of young BMT on microglia.** (A) The number of microglia (Iba-1<sup>+</sup>, red) within 15 µm of amyloid plaque (6E10, green) in the cortex. Un-paired t-test. (B) Schematic of experimental design for RNA-seq analysis. n = 4 per group. (C) Volcano plot presenting significantly upregulated (red) and downregulated (blue) (cutoff of  $\log_2|\text{FC}| > 0.5$ ; p-value < 0.05) genes in YTg BMCs compared to control OTgs. (D) Bar plots of the KEGG terms enriched by the DEGs in YTg BMCs microglia compared to

control OTgs. **(E)** Heatmap of significantly differentially expressed genes (p-value < 0.05) involved in phagocytosis related pathways in YTg BMCs and control OTg microglia. Color represents normalized expression value. **(F)** Relative expression of homeostatic and disease associated microglia (DAM) marker genes according to RNA-seq. **(G)** Schematic of experimental design for GFP BMCs transplantation. **(H)** Representative images of cortex in GFP BMCs recipient mice. **(I)** FACS plot of GFP<sup>+</sup> cells gated on CD11b<sup>+</sup> channel. The scale bar in a is 10  $\mu\text{m}$ , in h is 50  $\mu\text{m}$ , and the error bars are the SEMs.

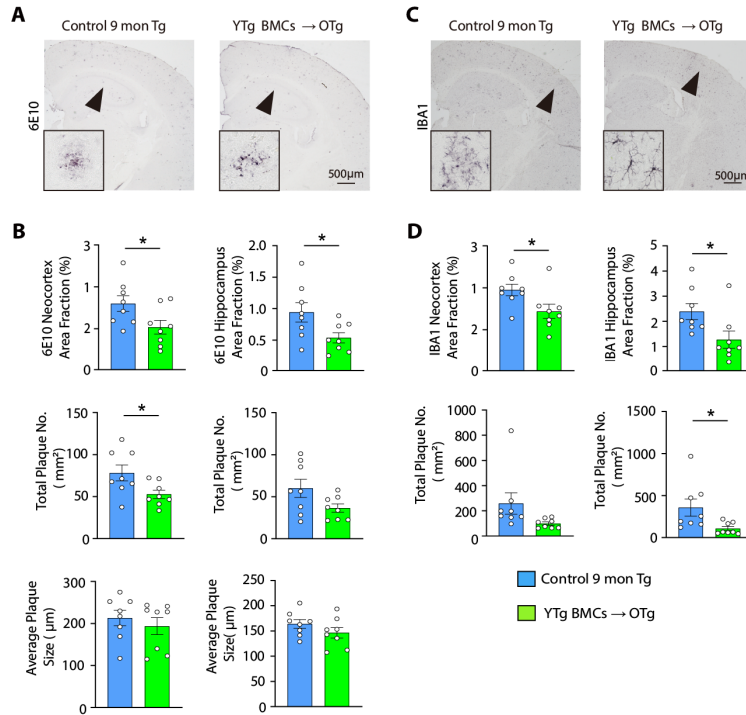

**Fig. S13. Comparison of plaque density and microgliosis in YTg BMCs and control 9-month APP/PS1 mice. (A, B)** Immunostaining and quantification of A $\beta$  plaques stained with 6E10 in the neocortex and hippocampus of YTg BMCs and control 9-month *APP/PS1* mice. Un-paired t-test. **(C, D)** Immunostaining and quantification of microglia stained with IBA1 in the neocortex and hippocampus of YTg BMCs and control 9-month *APP/PS1* mice. Un-paired t-test. n = 8 per group; \*indicates p < 0.05. The scale bars are 500  $\mu$ m. The error bars are the SEMs.

Table S3. Characteristics of young and old CN-subjects

|                               | Old<br>(n= 10) | Young<br>(n= 10) | P values |
|-------------------------------|----------------|------------------|----------|
| Age, y [mean (SD)]            | 63.3 (10.9)    | 27.4 (3.2)       | < 0.0001 |
| Male, n (%)                   | 5 (50.0)       | 7 (70.0)         | 0.36     |
| Years of education, mean (SD) | 10.7 (4.8)     | 18.5 (2.1)       | 0.0002   |
| Comorbidities                 |                |                  |          |
| Hypertension, n (%)           | 4 (0.0)        | 0 (0.0)          | 0.02     |
| Diabetes mellitus, n (%)      | 1 (0.0)        | 0 (0.0)          | 0.30     |
| Hyperlipidemia, n (%)         | 2 (0.0)        | 0 (0.0)          | 0.14     |

SD, standard deviation.

Table S4. Demographic data of AD patients and age- and sex-matched CN controls

|                               | AD<br>(n=14) | CN<br>(n=13) | P value  |
|-------------------------------|--------------|--------------|----------|
| Age, y [mean (SD)]            | 69.1 (9.7)   | 67.2 (7.6)   | 0.55     |
| Male, n (%)                   | 6 (42.8)     | 6 (46.1)     | 0.86     |
| Years of education, mean (SD) | 10.2 (4.2)   | 10.8 (3.5)   | 0.66     |
| MMSE, mean (SD)               | 13.6 (8.9)   | 27.1 (2.2)   | < 0.0001 |
| CDR, mean (SD)                | 1.3 (0.9)    | 0.1 (0.2)    | < 0.0001 |
| ADL, mean (SD)                | 34.3 (13.5)  | 92 (14.2)    | < 0.0001 |
| Comorbidities                 |              |              |          |
| Hypertension, n (%)           | 3 (21.4)     | 6 (46.1)     | 0.17     |
| Diabetes mellitus, n (%)      | 1 (7.1)      | 3 (23.1)     | 0.24     |
| Hyperlipidemia, n (%)         | 1 (7.1)      | 1 (7.7)      | 0.96     |

168

169 AD, Alzheimer's disease; CN, cognitively normal control; SD, standard deviation;

170 MMSE, Mini-Mental State Examination; ADL, Activities of Daily Living; CDR,

171 Clinical Dementia Rating.

172

173

174 Table S1. Plasma proteome of all groups

175

176 Table S2. SASP proteins in plasma

17

Table S5. qPCR primers used in this study
